# Supplementary material for: Single-mutation fitness landscapes for an enzyme on multiple substrates reveal specificity is globally encoded
Source: PubMed Central journal article supplement (PMC5467163; doi:10.1038/ncomms15695), 2017-06-06
Supplement: ncomms15695-s1.pdf [file ncomms15695-s1.pdf]

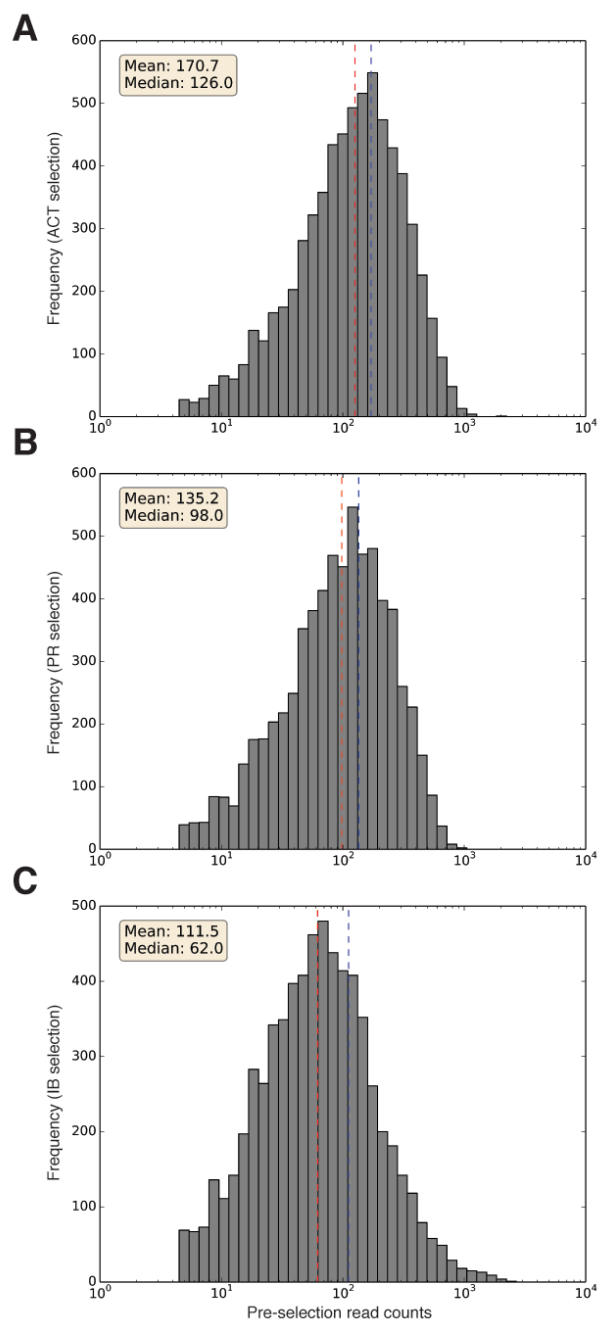

### Supplementary Fig. 1

Frequency distribution of library member counts in the pre-selection libraries for A.) acetamide B.) propionamide and C.) isobutyramide. Vertical lines indicate median (red) and mean (blue) read coverage.

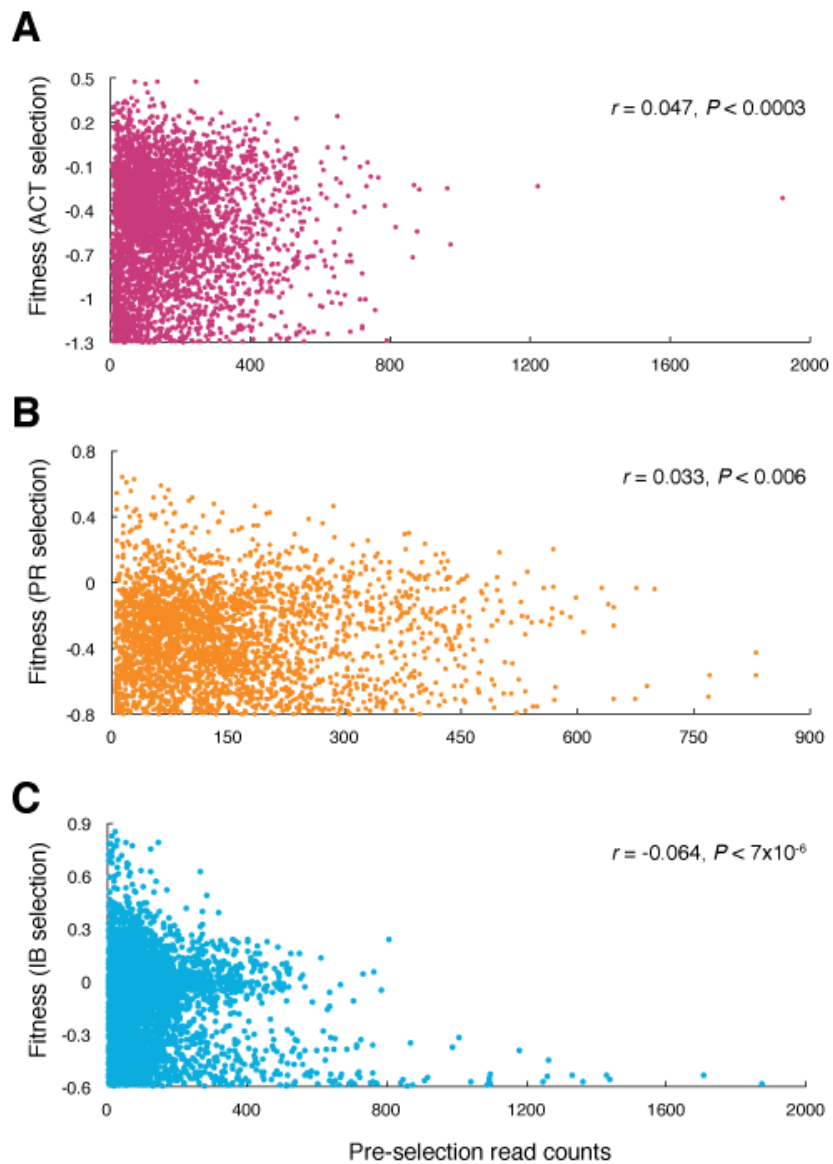

### Supplementary Fig. 2

Fitness versus pre-selection read counts for each variant in the A.) acetamide B.) propionamide and C.) isobutyramide libraries. Variants with insignificant read counts ( $n \leq 5$ ) and fitness metrics below the lower bounds were excluded from the analysis. Plots represent  $n = 4037$ , 3135, and 4969 variants. P-values for Pearson's product moment correlation coefficients were calculated using a two-tailed t-test.

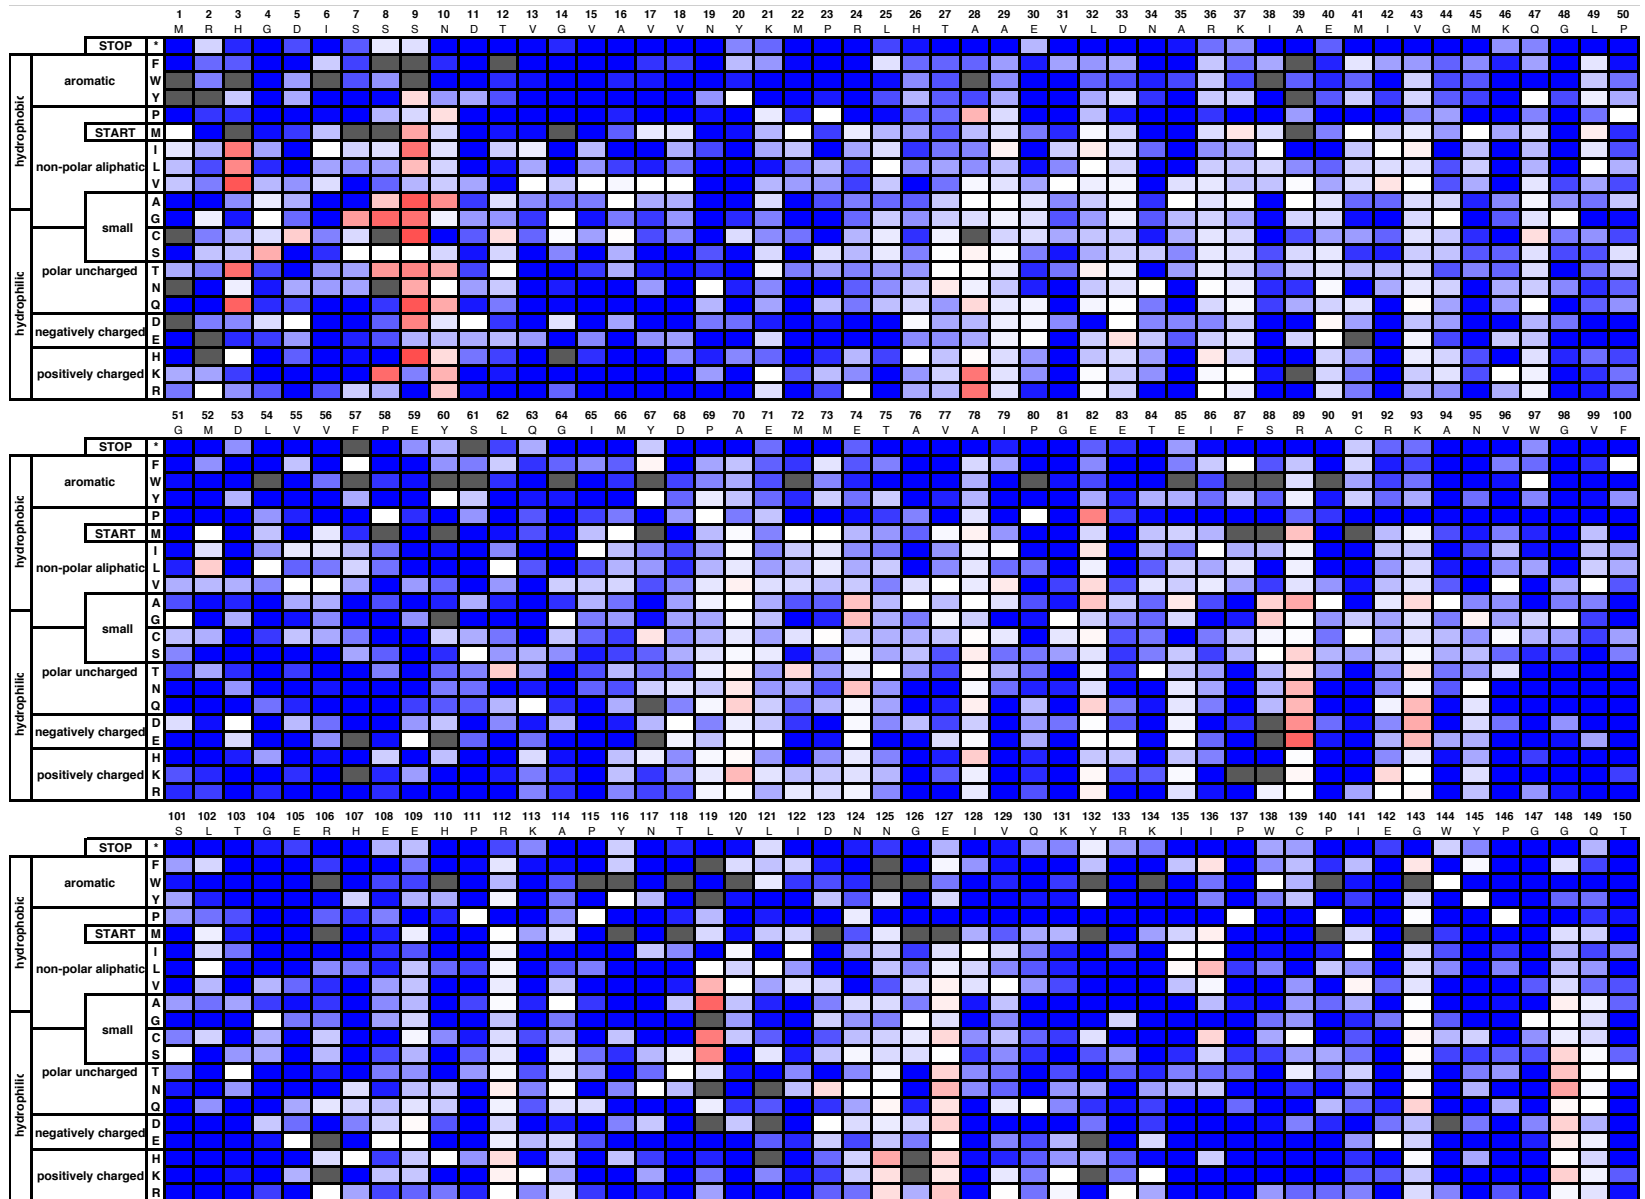



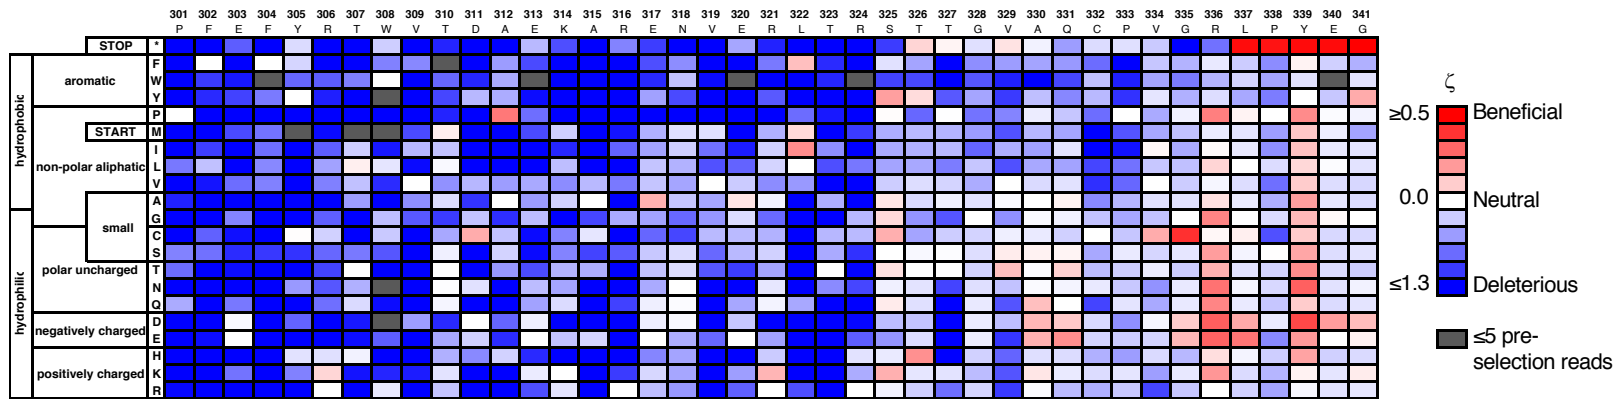

### Supplementary Fig. 3

Fitness landscape for acetamide selection.

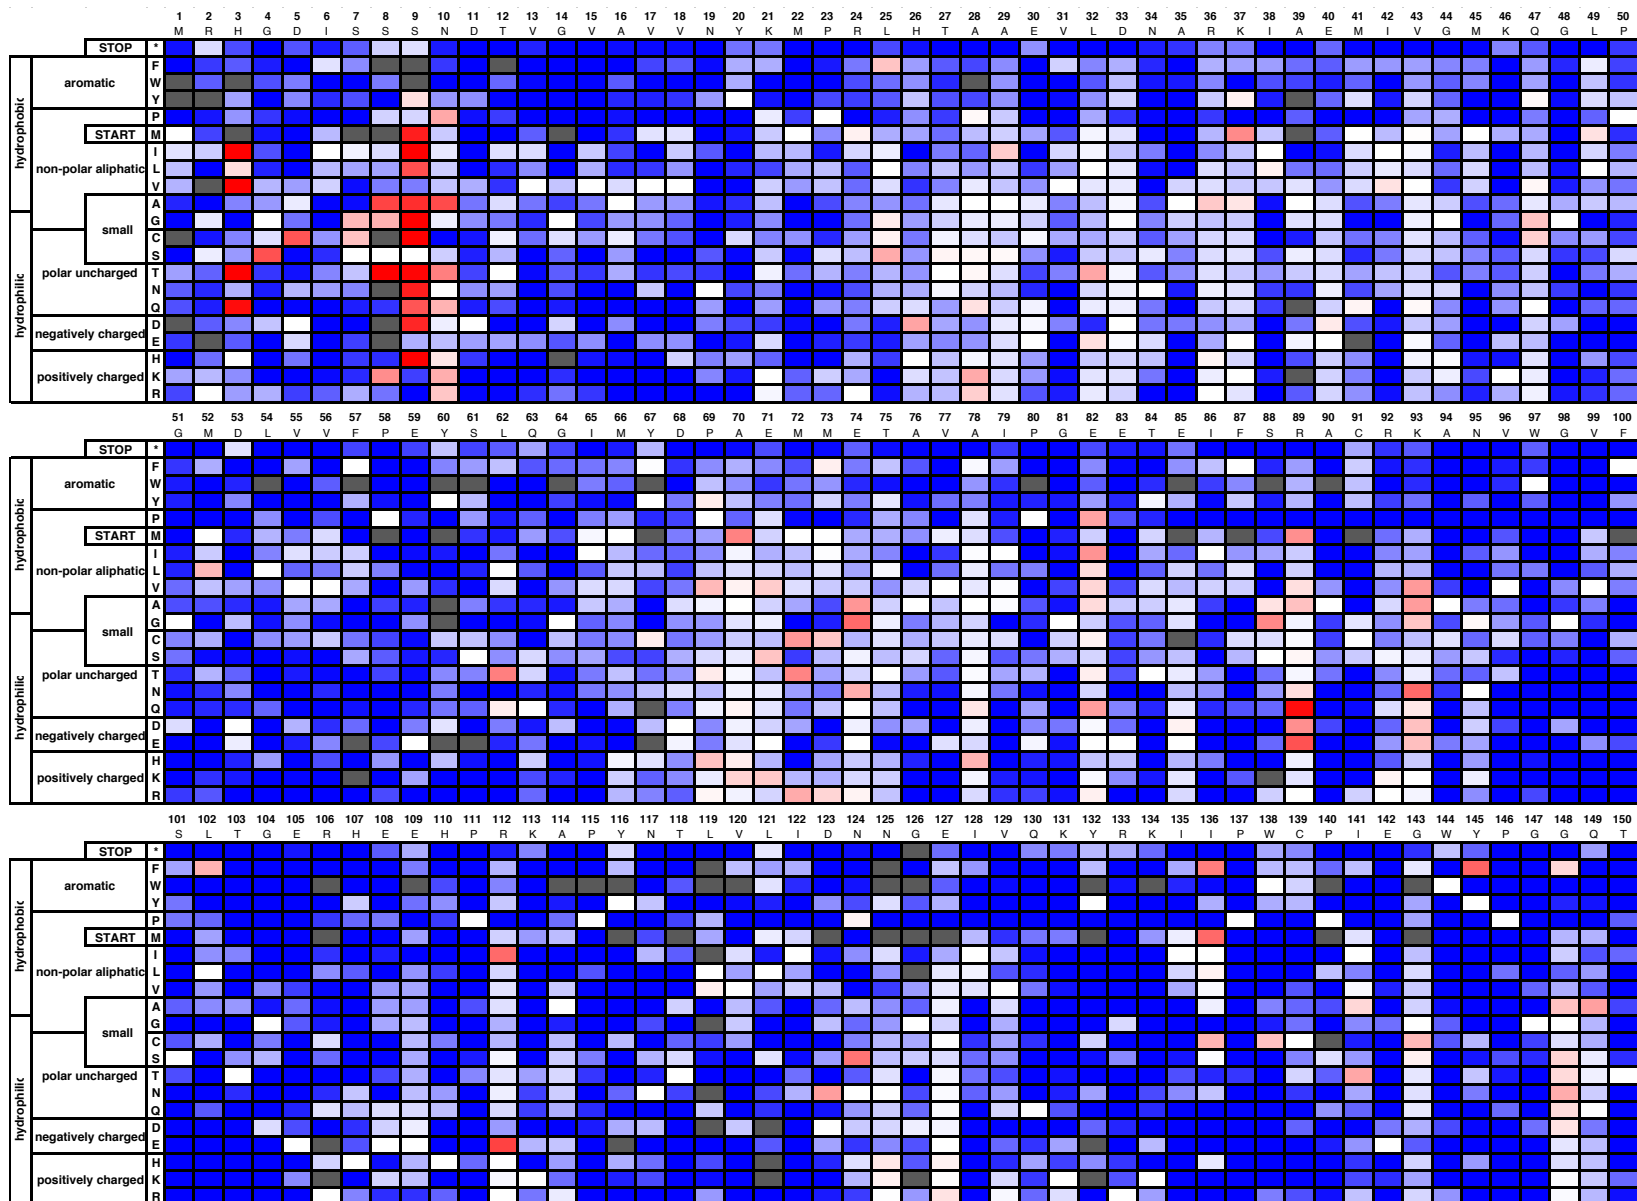



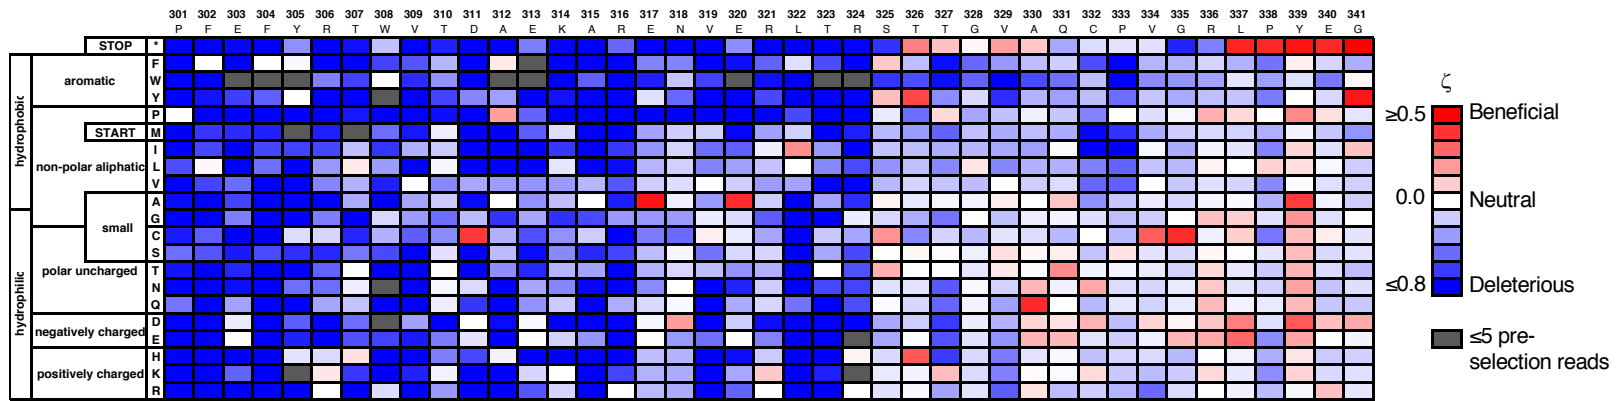

### Supplementary Fig. 4

Fitness landscape for propionamide selection.



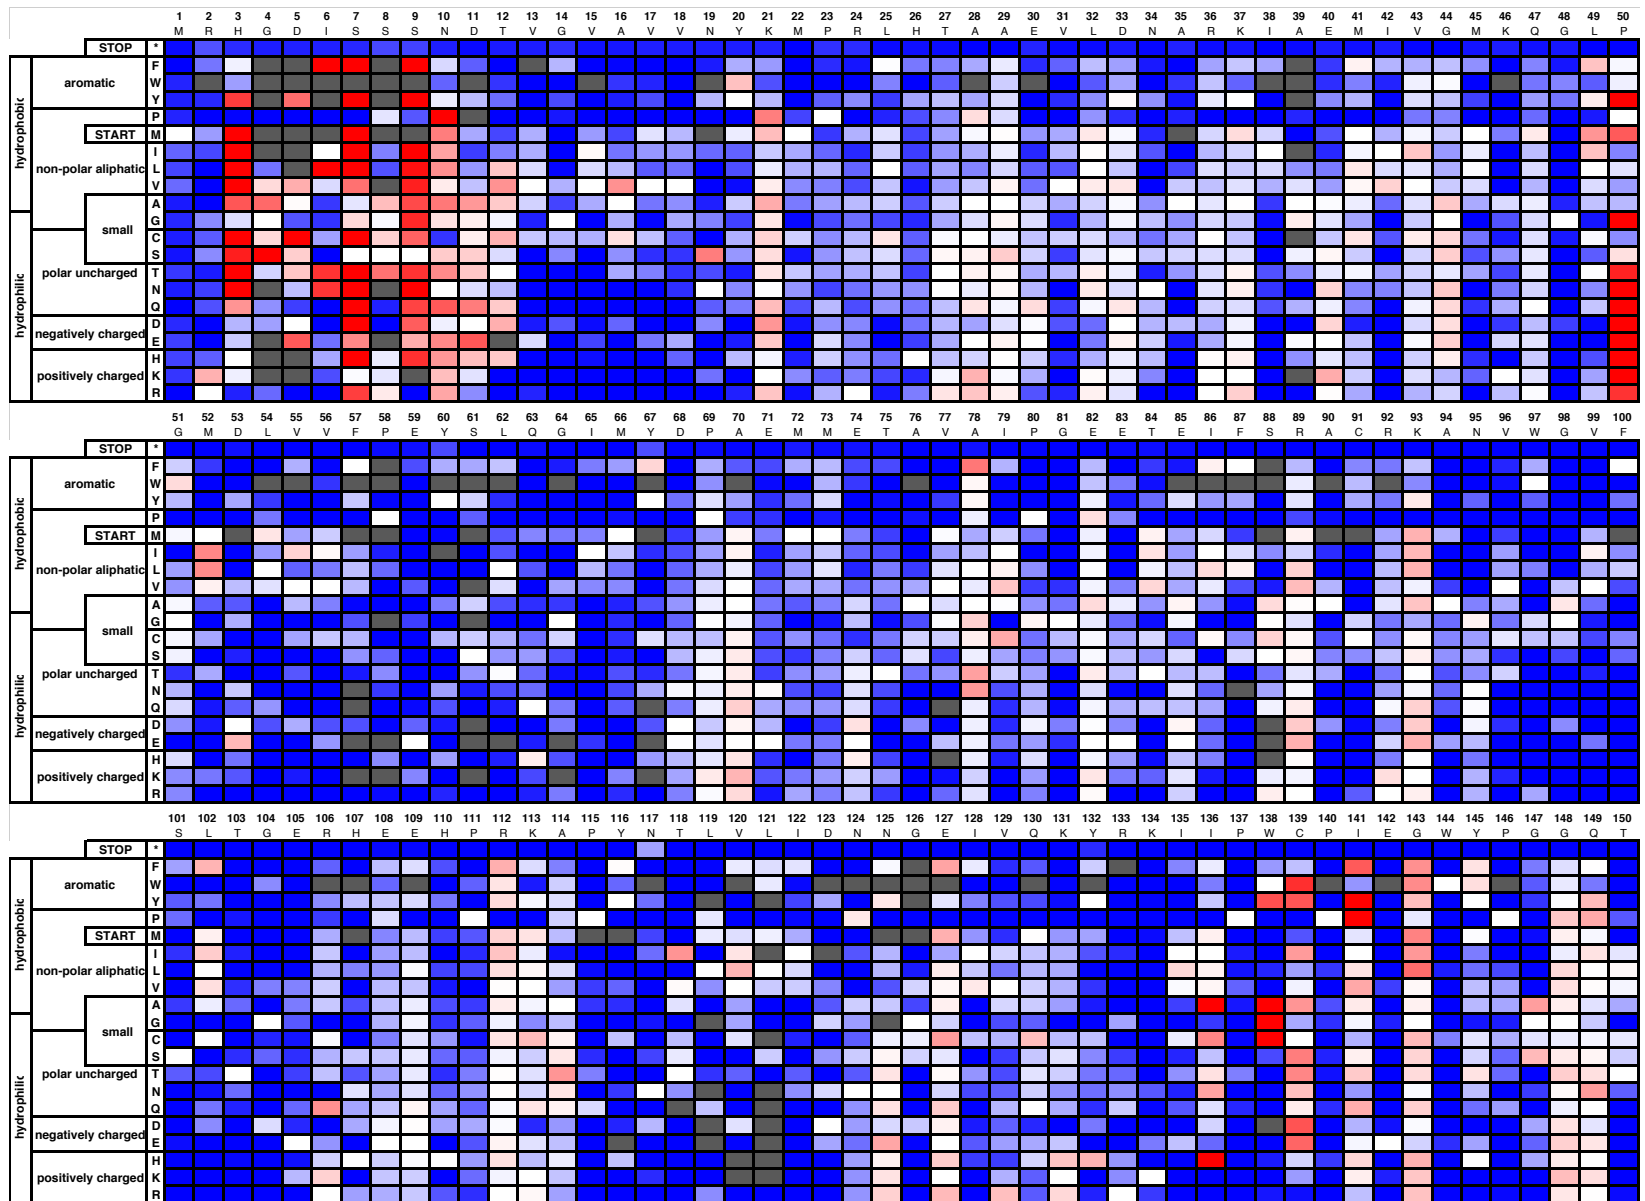

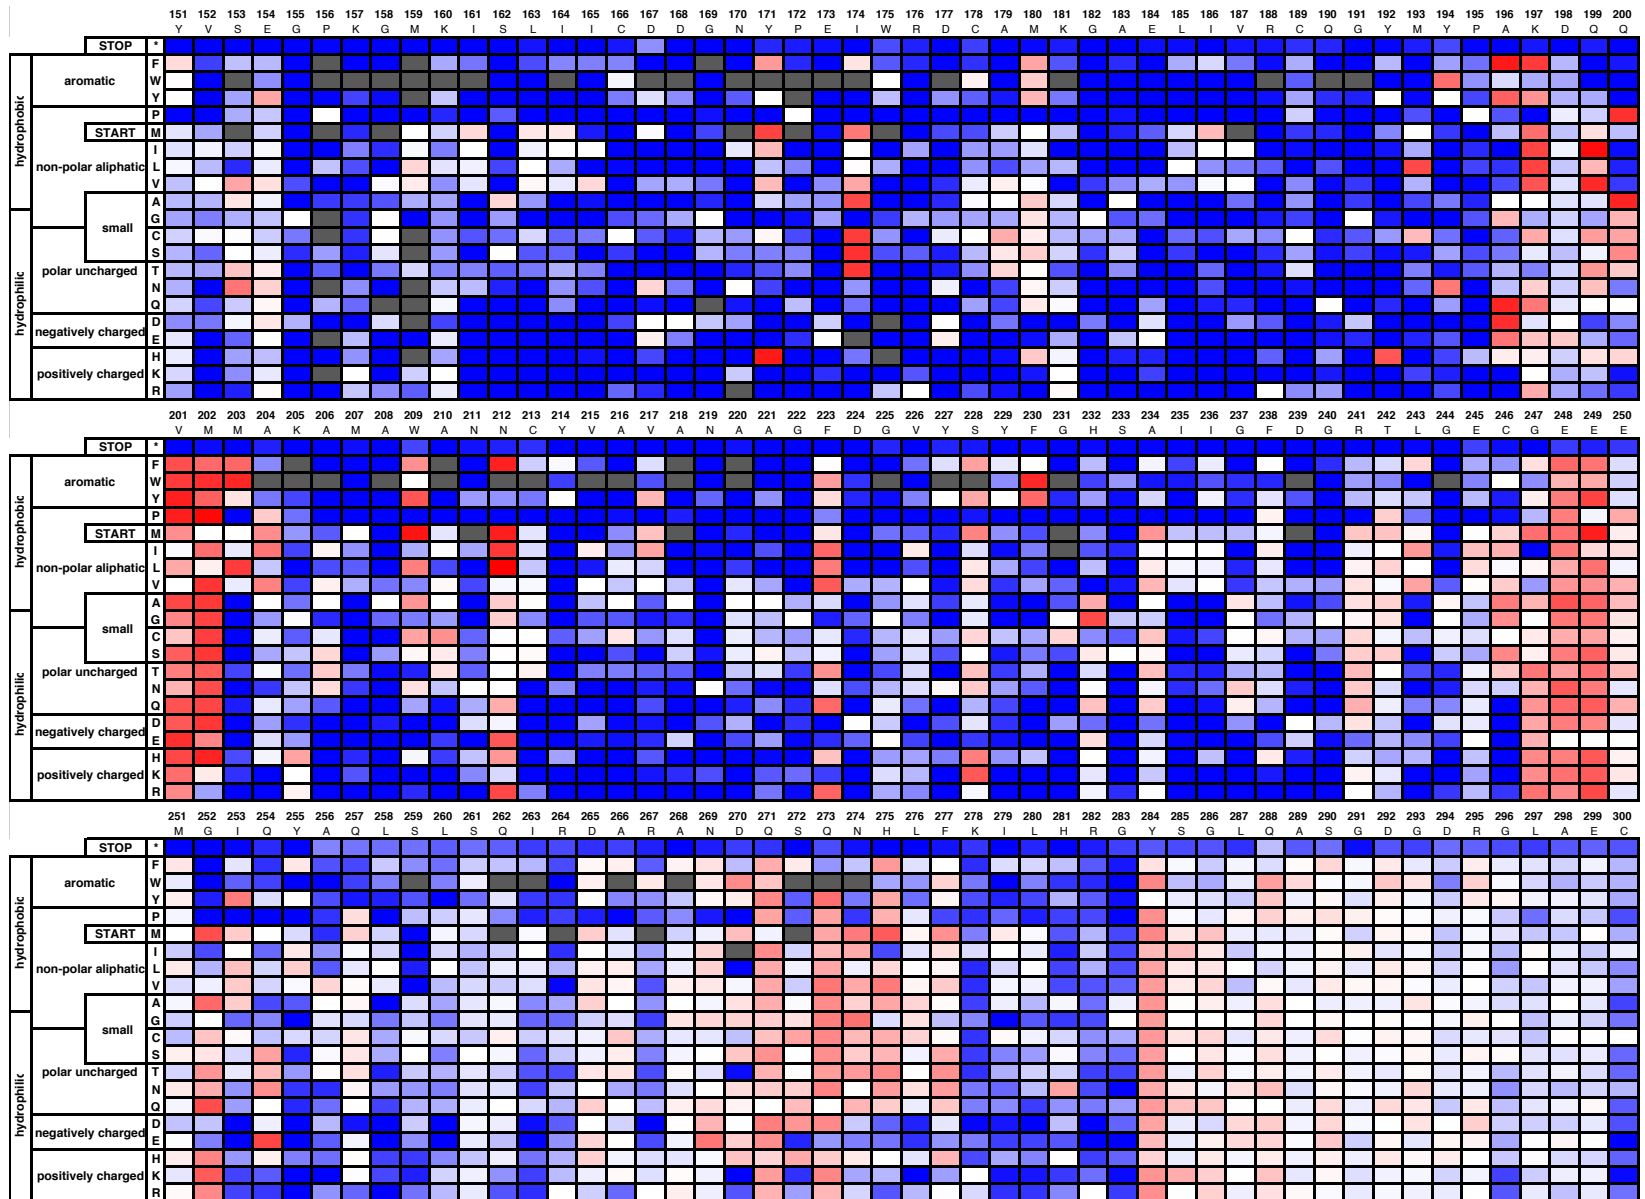

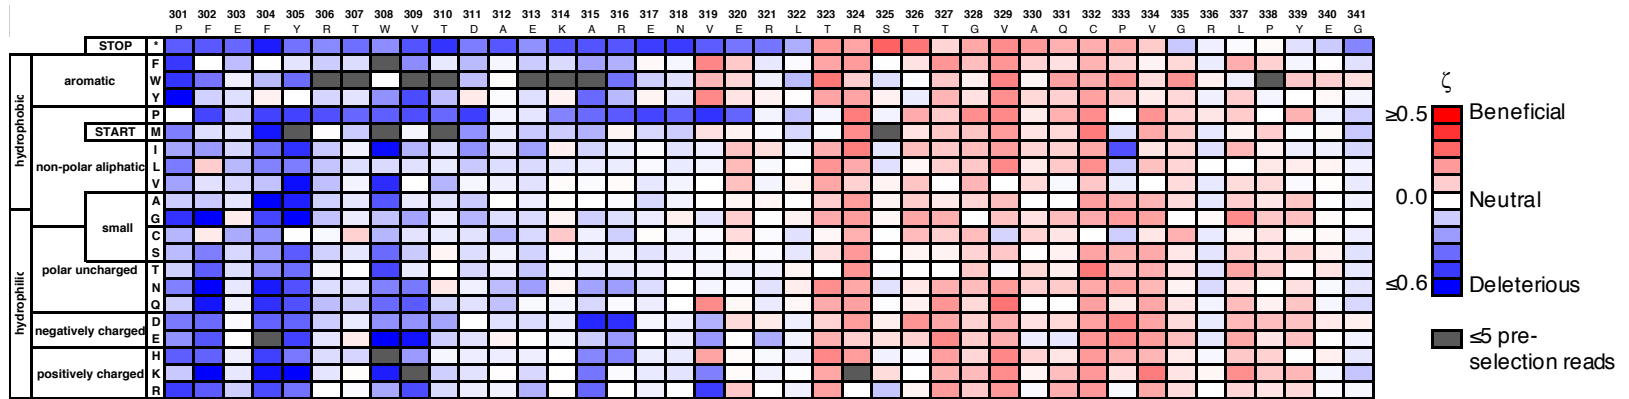

### Supplementary Fig. 5

Fitness landscape for isobutyramide selection.

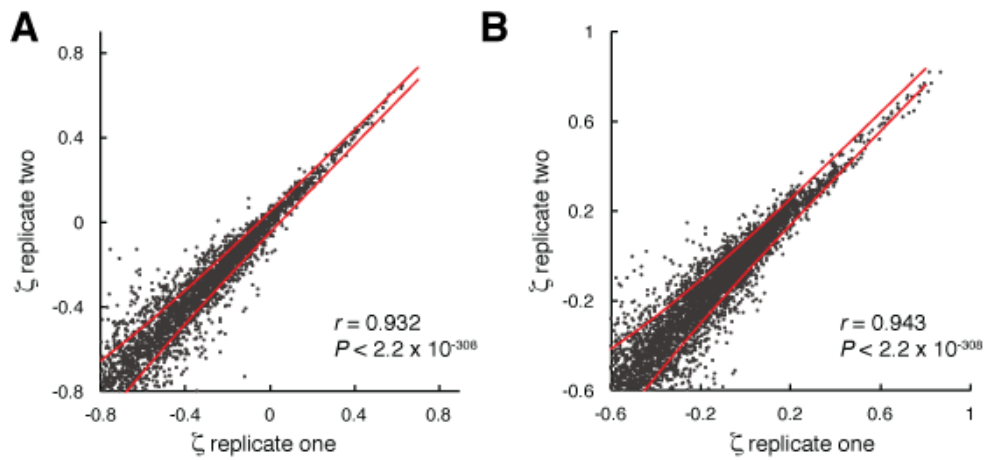

### Supplementary Fig. 6

Fitness metrics from biological replicate growth selection experiments in A.) acetamide and B.) isobutyramide media. Plots represent  $n = 3834$  and  $4977$  variants for panels A and B, respectively. Red lines indicate two standard deviations from theoretical error estimation<sup>1</sup>. P-values for Pearson's product moment correlation coefficients were calculated using a two-tailed t-test.

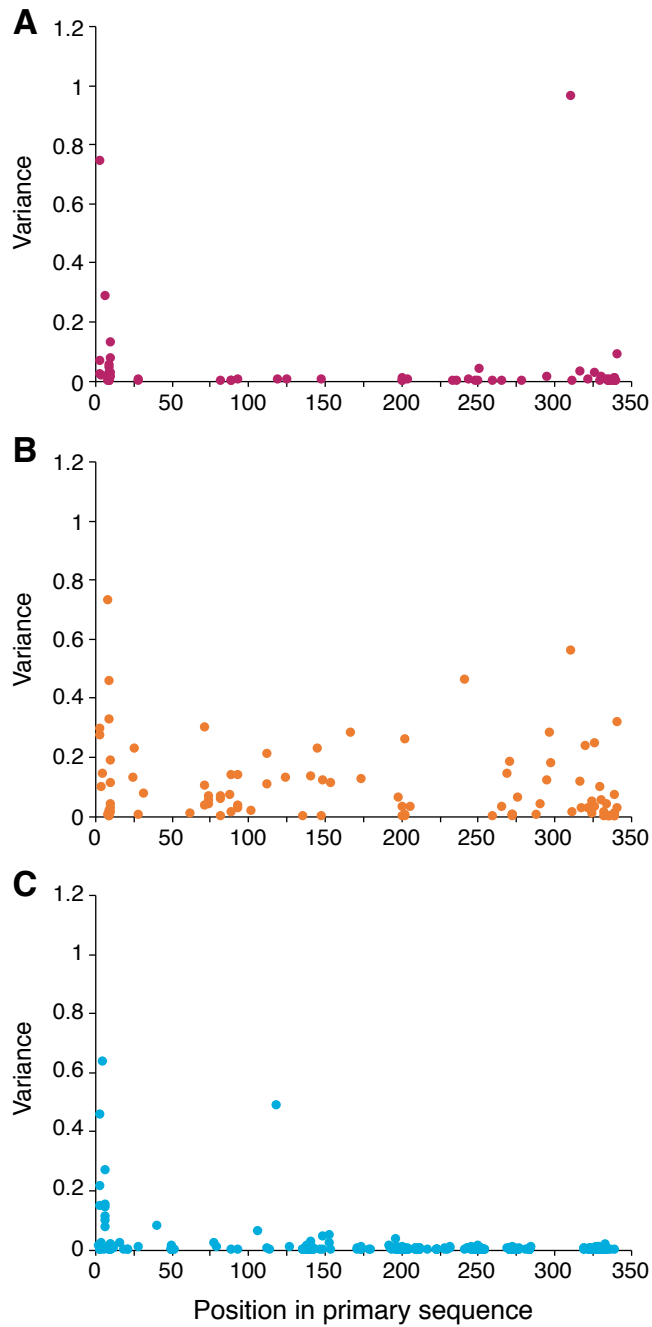

### Supplementary Fig. 7

Variance of fitness metrics for synonymous codons of beneficial mutations ( $\zeta > 0.15$ ) for the A.) acetamide B.) propionamide and C.) isobutyramide selections as a function of position in the primary sequence.

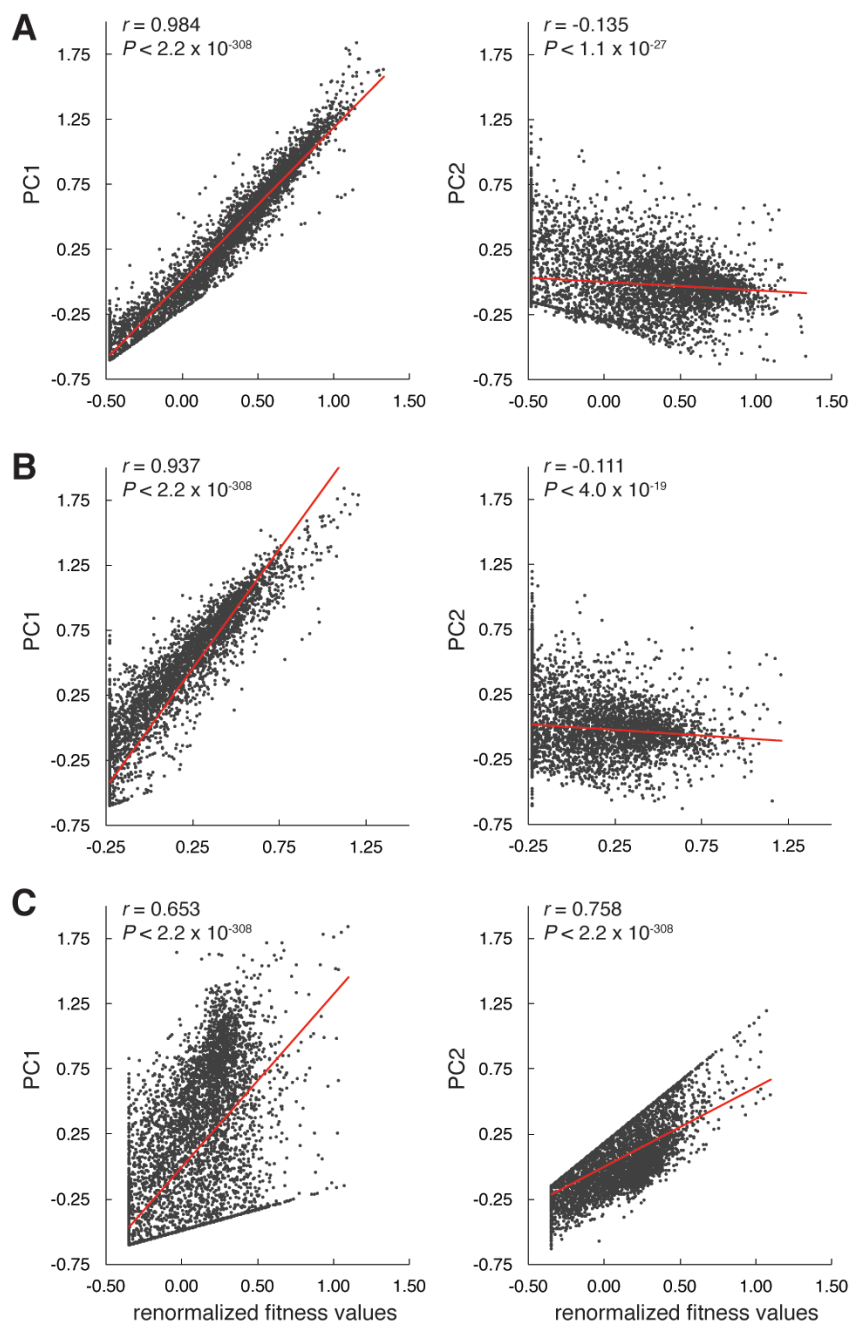

### Supplementary Fig. 8

Principle component analysis of renormalized fitness values for A.) acetamide B.) propionamide and C.) isobutyramide selections. Fitness values were renormalized by subtracting the mean fitness (mean = -0.824, -0.575, -0.255 for acetamide, propionamide, and isobutyramide, respectively) from each variant. P-values for Pearson's product moment correlation coefficients were calculated using a two-tailed t-test.

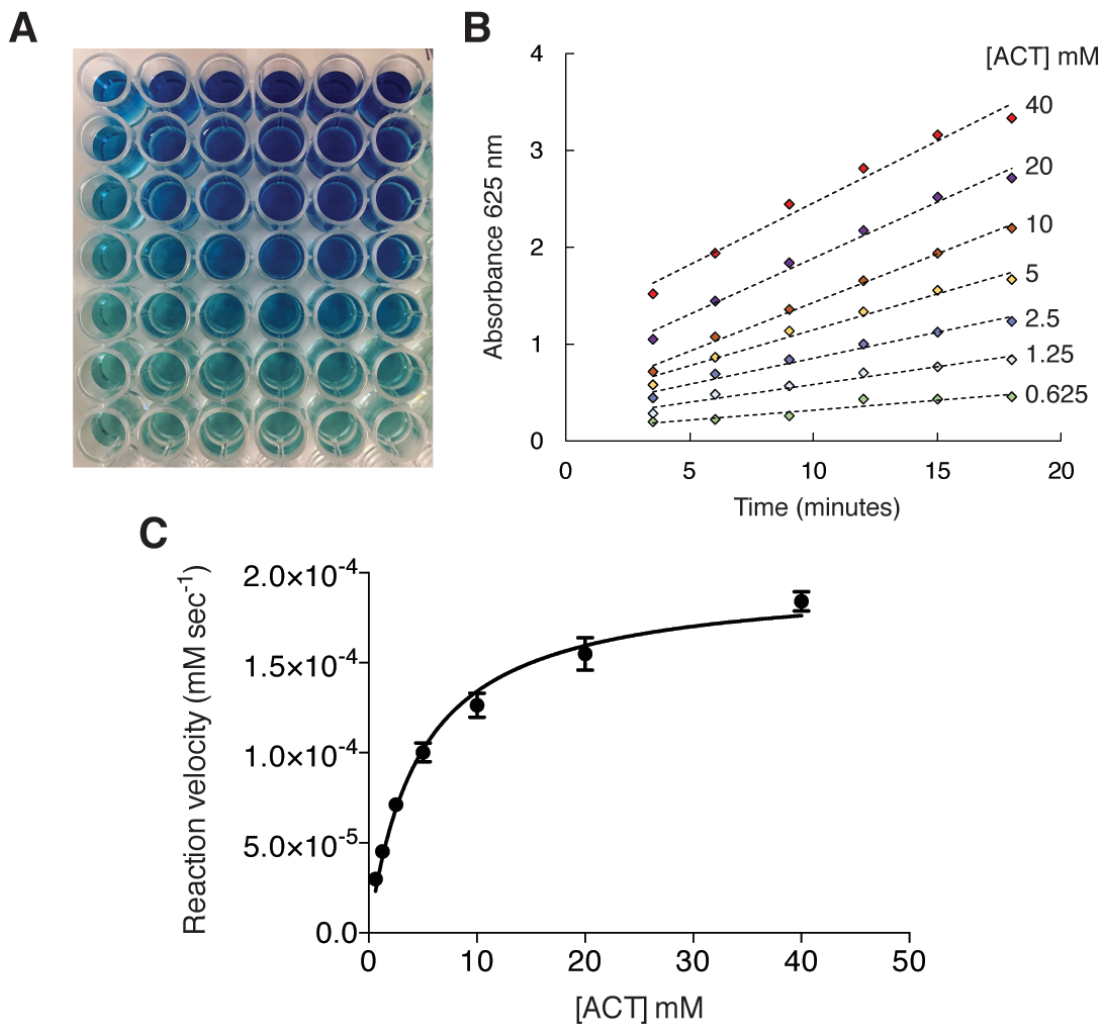

### Supplementary Fig. 9

amiE activity assay. A.) amiE activities were measured using a colorimetric Berthelot reaction<sup>2,3</sup> for ammonia detection with phenol nitroprusside and alkaline hypochlorite. B.) Representative data for the amiE activity assay. Absorbance at 625 nm was measured at discrete time intervals for reactions containing one of seven concentrations of acetamide (ACT) and purified wild-type amiE. Reaction velocities were calculated by obtaining the slopes of each line. C.) Michaelis-Menten plot of wild-type amiE activity on acetamide substrate. Plot represents four independent measurements. Non-linear regression was performed using GraphPad Prism version 6 for Mac OS X, GraphPad Software, La Jolla California USA, [www.graphpad.com](http://www.graphpad.com).

### Supplementary Table 1.

Constructs used in growth selections. ACT, PR, and IB = acetamide, propionamide, and isobutyramide selection media (see **Methods**). Promoters obtained from Bienick et al.<sup>3</sup>.

| plasmid         | selection media | promoter | -35 hexamer | -10 hexamer | RBS name | RBS sequence | $\mu_{S,wt} (hr^{-1})$<br>$\mu_{M9,wt} (hr^{-1})$<br>$\mu_{S,wt}/\mu_{M9,wt}$ |
|-----------------|-----------------|----------|-------------|-------------|----------|--------------|-------------------------------------------------------------------------------|
| pJK_proK17_amiE | <b>ACT</b>      | proK17   | TTCCCG      | TAATAT      | t7RBS    | AGGAGA       | 0.60 ± 0.02                                                                   |
|                 |                 |          |             |             |          |              | 0.65 ± 0.03                                                                   |
|                 |                 |          |             |             |          |              | <b>0.92 ± 0.05</b>                                                            |
| pEDA2_amiE      | <b>ACT</b>      | proK17   | TTCCCG      | TAATAT      | kRBS3    | AGTTTT       | 0.44 ± 0.04                                                                   |
|                 |                 |          |             |             |          |              | 0.78 ± 0.03                                                                   |
|                 |                 |          |             |             |          |              | <b>0.56 ± 0.06</b>                                                            |
| pEDA2_amiE      | <b>PR</b>       | proK17   | TTCCCG      | TAATAT      | kRBS3    | AGTTTT       | 0.29 ± 0.06                                                                   |
|                 |                 |          |             |             |          |              | 0.78 ± 0.03                                                                   |
|                 |                 |          |             |             |          |              | <b>0.37 ± 0.08</b>                                                            |
| pEDA6_amiE      | <b>IB</b>       | proK14   | TGTACG      | TAATAT      | t7RBS    | AGGAGA       | 0.36 ± 0.07                                                                   |
|                 |                 |          |             |             |          |              | 0.66 ± 0.04                                                                   |
|                 |                 |          |             |             |          |              | <b>0.54 ± 0.11</b>                                                            |



**Supplementary Table 2.**

Library coverage statistics for combined amiE libraries (replicate 1 and 2) used in the acetamide, propionamide, and isobutyramide selections. Raw sequencing reads were quality filtered using Enrich<sup>4</sup>.

|                                                                | <b>Acetamide selection</b> | <b>Propionamide selection</b> | <b>Isobutyramide selection</b> |
|----------------------------------------------------------------|----------------------------|-------------------------------|--------------------------------|
| <b>Pre-selection population DNA reads post quality filter</b>  | 1,935,216                  | 1,735,919                     | 1,390,991                      |
| <b>Post-selection population DNA reads post quality filter</b> | 7,738,122                  | 3,236,744                     | 2,831,599                      |
|                                                                |                            |                               |                                |
| <b>Percent of possible codon substitutions observed:</b>       |                            |                               |                                |
| 1-base substitution                                            | 100.0                      | 100.0                         | 100.0                          |
| 2-base substitution                                            | 97.6                       | 97.6                          | 98.5                           |
| 3-base substitution                                            | 95.7                       | 95.6                          | 97.2                           |
| All substitutions                                              | 97.1                       | 97.1                          | 98.1                           |
| <b>Percent of reads in pre-selection library with:</b>         |                            |                               |                                |
| No nonsynonymous mutations                                     | 40.0                       | 39.6                          | 38.3                           |
| One nonsynonymous mutation                                     | 52.0                       | 51.8                          | 52.6                           |
| Multiple nonsynonymous mutations                               | 8.0                        | 8.7                           | 9.1                            |
| <b>Coverage of possible single nonsynonymous mutations:</b>    | <b>97.2</b>                | <b>97.2</b>                   | <b>96.3</b>                    |

**Supplementary Table 3.**

Isogenic growth and lysate flux data. Confidence intervals in error are given as 1 s.d. of at least 3 independent measurements.

| variant  | fitness metric (selection) | $\mu_i$ (hr <sup>-1</sup> ) | $\mu_i/\mu_{WT}$ | theoretical $\mu_i/\mu_{WT}$ | lysate flux $J_i/J_{WT}$ (mmol NH <sub>3</sub> gDCW <sup>-1</sup> hr <sup>-1</sup> ) |
|----------|----------------------------|-----------------------------|------------------|------------------------------|--------------------------------------------------------------------------------------|
| wildtype | 0.00 (ACT)                 | 0.44 ± 0.04                 | 1.00             | 1.00                         | 0.15 ± 0.02                                                                          |
| wildtype | 0.00 (PR)                  | 0.29 ± 0.06                 | 1.00             | 1.00                         | *                                                                                    |
| wildtype | 0.00 (IB)                  | 0.36 ± 0.07                 | 1.00             | 1.00                         | 0.11 ± 0.01                                                                          |
| S9A      | 0.33 (ACT)                 | 0.68 ± 0.04                 | 1.40 ± 0.08      | 1.26                         | nd                                                                                   |
| A28R     | 0.27 (ACT)                 | 0.59 ± 0.03                 | 1.44 ± 0.07      | 1.21                         | nd                                                                                   |
| L119A    | 0.30 (ACT)                 | 0.66 ± 0.01                 | 1.35 ± 0.03      | 1.23                         | 1.98 ± 0.66                                                                          |
| I136A    | -0.07 (PR)                 | 0.26 ± 0.00                 | 0.78 ± 0.01      | 0.95                         | nd                                                                                   |
| I136A    | 0.52 (IB)                  | 0.58 ± 0.00                 | 1.31 ± 0.01      | 1.43                         | nd                                                                                   |
| I136H    | -0.10 (PR)                 | 0.33 ± 0.01                 | 0.96 ± 0.02      | 0.94                         | nd                                                                                   |
| Q149A    | 0.19 (PR)                  | 0.25 ± 0.00                 | 0.88 ± 0.01      | 1.14                         | nd                                                                                   |
| I165C    | 0.25 (ACT)                 | 0.62 ± 0.03                 | 1.51 ± 0.08      | 1.19                         | nd                                                                                   |
| Y192V    | -1.3 (ACT)                 | ng                          | nd               |                              | nd                                                                                   |
| V201M    | 0.12 (PR)                  | 0.37 ± 0.01                 | 1.09 ± 0.03      | 1.09                         | nd                                                                                   |
| V201M    | 0.22 (IB)                  | 0.50 ± 0.00                 | 1.29 ± 0.07      | 1.17                         | nd                                                                                   |
| V201T    | 0.20 (ACT)                 | 0.52 ± 0.01                 | 1.07 ± 0.02      | 1.15                         | 2.08 ± 0.66                                                                          |
| V201T    | 0.34 (PR)                  | 0.39 ± 0.00                 | 1.17 ± 0.01      | 1.27                         | nd                                                                                   |
| V201T    | 0.25 (IB)                  | 0.56 ± 0.01                 | 1.25 ± 0.02      | 1.19                         | 1.9 ± 0.23                                                                           |
| M203W    | 0.43 (IB)                  | 0.61 ± 0.01                 | 1.86 ± 0.07      | 1.34                         | 0.69 ± 0.07                                                                          |
| A234M    | 0.33 (ACT)                 | 0.63 ± 0.01                 | 1.29 ± 0.03      | 1.25                         | nd                                                                                   |
| A234M    | 0.15 (PR)                  | 0.42 ± 0.01                 | 1.25 ± 0.02      | 1.11                         | nd                                                                                   |
| A234M    | 0.21 (IB)                  | 0.50 ± 0.01                 | 1.14 ± 0.02      | 1.15                         | nd                                                                                   |
| I236Y    | 0.26 (ACT)                 | 0.60 ± 0.00                 | 1.22 ± 0.02      | 1.20                         | nd                                                                                   |
| Q273A    | 0.23 (IB)                  | 0.59 ± 0.01                 | 1.55 ± 0.09      | 1.17                         | nd                                                                                   |

\*error in measurements was prohibitively high for calculating ratios

nd = not determined

ng = no growth

### Supplementary Table 4.

Pearson correlation analysis of mRNA model parameters calculated as in<sup>5</sup> with codon fitness metrics obtained in this work. Analysis was restricted to variants with  $\geq 50$  pre-selection read counts.

|                            |                            |                         | All codons      |              | Codons 2-16   |              |       |
|----------------------------|----------------------------|-------------------------|-----------------|--------------|---------------|--------------|-------|
|                            |                            | Term                    | <i>r</i>        | p-value      | <i>r</i>      | p-value      |       |
| ACT                        |                            | # of variants           | 6760            |              | 196           |              |       |
|                            | mRNA folding parameters    | $\Delta G_{UH}$         | -0.022          | 0.073        | -0.111        | 0.122        |       |
|                            |                            | $a_H$                   | 0.008           | 0.492        | 0.069         | 0.338        |       |
|                            |                            | $g_H$                   | -0.003          | 0.814        | -0.003        | 0.966        |       |
|                            |                            | $u_{3H}$                | 0.012           | 0.325        | 0.163         | 0.022        |       |
|                            |                            | $\pi(\theta_{wt})$      | <b>-0.022</b>   | <b>0.069</b> | <b>0.219</b>  | <b>0.002</b> |       |
|                            | Codon influence parameters | $\sum \beta_c f_c$      | -0.033          | 0.007        | 0.301         | 0.000        |       |
|                            |                            | $s_{7-16}$              | 0.031           | 0.010        | 0.247         | 0.000        |       |
|                            |                            | $s_{17-32}$             | -0.020          | 0.092        | -             | -            |       |
|                            |                            | <i>r</i>                | 0.023           | 0.061        | 0.084         | 0.240        |       |
|                            | PR                         |                         | # of variants   | 6193         |               | 161          |       |
|                            |                            | mRNA folding parameters | $\Delta G_{UH}$ | -0.0293      | 0.021         | -0.1421      | 0.071 |
|                            |                            |                         | $a_H$           | 0.0036       | 0.777         | 0.0625       | 0.429 |
|                            |                            |                         | $g_H$           | -0.0131      | 0.303         | -0.0641      | 0.418 |
| $u_{3H}$                   |                            |                         | -0.0061         | 0.630        | 0.1002        | 0.205        |       |
|                            |                            | $\pi(\theta_{wt})$      | <b>-0.0131</b>  | <b>0.303</b> | <b>0.2256</b> | <b>0.004</b> |       |
| Codon influence parameters |                            | $\sum \beta_c f_c$      | -0.0087         | 0.496        | 0.2795        | 0.000        |       |
|                            |                            | $s_{7-16}$              | 0.0245          | 0.054        | 0.3097        | 0.000        |       |
|                            |                            | $s_{17-32}$             | -0.0147         | 0.248        | -             | -            |       |
|                            |                            | <i>r</i>                | 0.0131          | 0.304        | 0.1038        | 0.189        |       |
| IB                         |                            |                         | # of variants   | 2975         |               | 43           |       |
|                            |                            | mRNA folding parameters | $\Delta G_{UH}$ | 0.015        | 0.407         | -0.025       | 0.874 |
|                            |                            |                         | $a_H$           | 0.097        | 0.000         | 0.275        | 0.071 |
|                            |                            |                         | $g_H$           | -0.066       | 0.000         | -0.161       | 0.297 |
|                            | $u_{3H}$                   |                         | 0.088           | 0.000        | 0.162         | 0.295        |       |
|                            |                            | $\pi(\theta_{wt})$      | <b>0.044</b>    | <b>0.017</b> | <b>0.064</b>  | <b>0.678</b> |       |
|                            | Codon influence parameters | $\sum \beta_c f_c$      | -0.048          | 0.008        | -0.224        | 0.143        |       |
|                            |                            | $s_{7-16}$              | 0.028           | 0.125        | -0.303        | 0.045        |       |
|                            |                            | $s_{17-32}$             | -0.016          | 0.392        | -             | -            |       |
|                            |                            | <i>r</i>                | -0.015          | 0.402        | -0.012        | 0.936        |       |

### Supplementary Table 5.

Gene amplification primers used to prepare samples for deep sequencing.

| <b>Gene amplification: inner primers</b>                |                                                                         |
|---------------------------------------------------------|-------------------------------------------------------------------------|
| Fwd_Tile1_amiE                                          | <b>gttcagagttctacagtcgacga</b> cttaacttaagaagttttatacat                 |
| Fwd_Tile1_amiE-2                                        | <b>gttcagagttctacagtcgacga</b> cttaacttaagaaggagatatacat                |
| Fwd_Tile2_amiE                                          | <b>gttcagagttctacagtcgacga</b> tcggcgaagaaacggaa                        |
| Fwd_Tile3_amiE                                          | <b>gttcagagttctacagtcgacga</b> tcctgcatgacggtaat                        |
| Fwd_Tile4_amiE                                          | <b>gttcagagttctacagtcgacga</b> caagaaatgggcattcaatac                    |
| Rev_Tile1_amiE                                          | ccttggcaccgagaattcca <b>aa</b> gcacggctaaagat                           |
| Rev_Tile2_amiE                                          | ccttggcaccgagaattcca <b>ct</b> ctccaaatttccggata                        |
| Rev_Tile3_amiE                                          | ccttggcaccgagaattcca <b>ca</b> gagacaactgcgc                            |
| Rev_Tile4_amiE                                          | ccttggcaccgagaattcca <b>tg</b> tggtgctcgag                              |
| blue = Illumina sequencing primer; black = gene overlap |                                                                         |
| <b>Gene amplification: outer primers</b>                |                                                                         |
| Illumina_FWD                                            | <b>aatgatacggcgaccaccgagatctacac</b> gttcagagttctacagtcgga              |
| <b>Primer (selection, sample)</b>                       |                                                                         |
| RPI41 (ACT, T1-1)                                       | <b>caagcagaagacggcatacagagat</b> GTCGTCgtgactggagttccttggcaccgagaattcca |
| RPI38 (ACT, T1-2)                                       | <b>caagcagaagacggcatacagagat</b> AGCTAGgtgactggagttccttggcaccgagaattcca |
| RPI33 (ACT, T2-1)                                       | <b>caagcagaagacggcatacagagat</b> CGCCTGgtgactggagttccttggcaccgagaattcca |
| RPI34 (ACT, T2-2)                                       | <b>caagcagaagacggcatacagagat</b> GCCATGgtgactggagttccttggcaccgagaattcca |
| RPI43 (ACT, T3-1)                                       | <b>caagcagaagacggcatacagagat</b> GCTGTAgtgactggagttccttggcaccgagaattcca |
| RPI40 (ACT, T3-2)                                       | <b>caagcagaagacggcatacagagat</b> TCTGAGgtgactggagttccttggcaccgagaattcca |
| RPI44 (ACT, T4-1)                                       | <b>caagcagaagacggcatacagagat</b> ATTATAgtgactggagttccttggcaccgagaattcca |
| RPI41 (ACT, T4-2)                                       | <b>caagcagaagacggcatacagagat</b> GTCGTCgtgactggagttccttggcaccgagaattcca |
| RPI37 (ACT, T1U)                                        | <b>caagcagaagacggcatacagagat</b> ATTCCGgtgactggagttccttggcaccgagaattcca |
| RPI22 (ACT, T2U)                                        | <b>caagcagaagacggcatacagagat</b> CGTACGgtgactggagttccttggcaccgagaattcca |
| RPI39 (ACT, T3U)                                        | <b>caagcagaagacggcatacagagat</b> GTATAGgtgactggagttccttggcaccgagaattcca |
| RPI40 (ACT, T4U)                                        | <b>caagcagaagacggcatacagagat</b> TCTGAGgtgactggagttccttggcaccgagaattcca |
| RPI25 (PR, T1-1)                                        | <b>caagcagaagacggcatacagagat</b> ATCAGTgtgactggagttccttggcaccgagaattcca |
| RPI26 (PR, T1-2)                                        | <b>caagcagaagacggcatacagagat</b> GCTCATgtgactggagttccttggcaccgagaattcca |
| RPI27 (PR, T2-1)                                        | <b>caagcagaagacggcatacagagat</b> AGGAATgtgactggagttccttggcaccgagaattcca |
| RPI28 (PR, T2-2)                                        | <b>caagcagaagacggcatacagagat</b> CTTTTgtgactggagttccttggcaccgagaattcca  |
| RPI29 (PR, T3-1)                                        | <b>caagcagaagacggcatacagagat</b> TAGTTGgtgactggagttccttggcaccgagaattcca |
| RPI30 (PR, T3-2)                                        | <b>caagcagaagacggcatacagagat</b> CCGGTGgtgactggagttccttggcaccgagaattcca |
| RPI31 (PR, T4-1)                                        | <b>caagcagaagacggcatacagagat</b> ATCGTGgtgactggagttccttggcaccgagaattcca |
| RPI32 (PR, T4-2)                                        | <b>caagcagaagacggcatacagagat</b> TGAGTGgtgactggagttccttggcaccgagaattcca |
| RPI21 (PR, T1U)                                         | <b>caagcagaagacggcatacagagat</b> CGAAACgtgactggagttccttggcaccgagaattcca |

|                                                                                           |                                                                         |
|-------------------------------------------------------------------------------------------|-------------------------------------------------------------------------|
| RPI22 (PR, T2U)                                                                           | caagcagaagacggcatacagagat <b>CGTACG</b> gtgactggagttcctggcaccgagaattcca |
| RPI23 (PR, T3U)                                                                           | caagcagaagacggcatacagagat <b>CCA</b> CTCgtgactggagttcctggcaccgagaattcca |
| RPI24 (PR, T4U)                                                                           | caagcagaagacggcatacagagat <b>GCTACC</b> gtgactggagttcctggcaccgagaattcca |
| RPI13 (IB, T1-1)                                                                          | caagcagaagacggcatacagagat <b>TTGACT</b> gtgactggagttcctggcaccgagaattcca |
| RPI14 (IB, T1-2)                                                                          | caagcagaagacggcatacagagat <b>GGA</b> ACTgtgactggagttcctggcaccgagaattcca |
| RPI15 (IB, T2-1)                                                                          | caagcagaagacggcatacagagat <b>TGACAT</b> gtgactggagttcctggcaccgagaattcca |
| RPI16 (IB, T2-2)                                                                          | caagcagaagacggcatacagagat <b>GGACGG</b> gtgactggagttcctggcaccgagaattcca |
| RPI17 (IB, T3-1)                                                                          | caagcagaagacggcatacagagat <b>CTCTAC</b> gtgactggagttcctggcaccgagaattcca |
| RPI18 (IB, T3-2)                                                                          | caagcagaagacggcatacagagat <b>GCGGAC</b> gtgactggagttcctggcaccgagaattcca |
| RPI19 (IB, T4-1)                                                                          | caagcagaagacggcatacagagat <b>TTTCAC</b> gtgactggagttcctggcaccgagaattcca |
| RPI20 (IB, T4-2)                                                                          | caagcagaagacggcatacagagat <b>GGCCAC</b> gtgactggagttcctggcaccgagaattcca |
| RPI9 (IB, T1U)                                                                            | caagcagaagacggcatacagagat <b>CTGATC</b> gtgactggagttcctggcaccgagaattcca |
| RPI10 (IB, T2U)                                                                           | caagcagaagacggcatacagagat <b>AAGCTA</b> gtgactggagttcctggcaccgagaattcca |
| RPI11 (IB, T3U)                                                                           | caagcagaagacggcatacagagat <b>GTAGCC</b> gtgactggagttcctggcaccgagaattcca |
| RPI12 (IB, T4U)                                                                           | caagcagaagacggcatacagagat <b>TACAAG</b> gtgactggagttcctggcaccgagaattcca |
| red = Illumina adapter sequence; <b>BOLD</b> = barcode; blue = Illumina sequencing primer |                                                                         |

### Supplementary References

1. Kowalsky, C. A. *et al.* High-Resolution Sequence-Function Mapping of Full-Length Proteins. *PLoS One* **10**, e0118193 (2015).
2. Searle, P. L. The Berthelot or indophenol reaction and its use in the analytical chemistry of nitrogen. A review. *Analyst* **109**, 549–568 (1984).
3. Bienick, M. S. *et al.* The Interrelationship between Promoter Strength, Gene Expression, and Growth Rate. *PLoS One* **9**, e109105 (2014).
4. Fowler, D. M., Araya, C. L., Gerard, W. & Fields, S. Enrich: Software for analysis of protein function by enrichment and depletion of variants. *Bioinformatics* **27**, 3430–3431 (2011).
5. Boël, G. *et al.* Codon influence on protein expression in *E. coli* correlates with mRNA levels. *Nature* **529**, 358–363 (2016).
